1 **Polychromatic solar energy conversion in pigment-protein chimeras that unite the**  
2 **two kingdoms of (bacterio)chlorophyll-based photosynthesis**

3

4 Juntai Liu,<sup>1</sup> Vincent M. Friebe,<sup>2</sup> Raoul N. Frese<sup>2</sup> and Michael R. Jones<sup>1\*</sup>

5

6 <sup>1</sup>School of Biochemistry, Faculty of Life Sciences, Biomedical Sciences Building, University of  
7 Bristol, University Walk, Bristol BS8 1TD, United Kingdom.

8 <sup>2</sup>Department of Physics and Astronomy, LaserLaB Amsterdam, VU University Amsterdam, De  
9 Boelelaan 1081, Amsterdam 1081 HV, The Netherlands.

10

11 \*Corresponding author (m.r.jones@bristol.ac.uk)

12

13

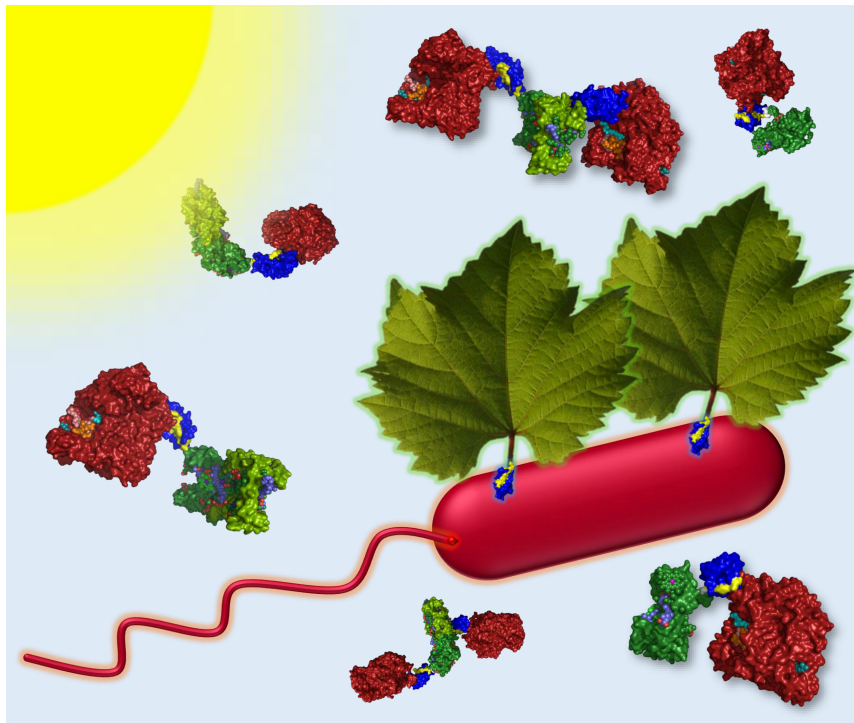

14

15

16

17

18

ToC image

19 **Natural photosynthesis can be divided between the chlorophyll-containing plants, algae and**  
20 **cyanobacteria that make up the oxygenic phototrophs and a diversity of bacteriochlorophyll-**  
21 **containing bacteria that make up the anoxygenic phototrophs. Photosynthetic light harvesting**  
22 **and reaction centre proteins from both groups of organisms have been exploited in a wide range**  
23 **of biohybrid devices for solar energy conversion, solar fuel synthesis and a variety of sensing**  
24 **technologies, but the energy harvesting abilities of these devices are limited by each protein's**  
25 **individual palette of (bacterio)chlorophyll, carotenoid and bilin pigments. In this work we**  
26 **demonstrate a range of genetically-encoded, self-assembling photosystems in which recombinant**  
27 **plant light harvesting complexes are covalently locked with reaction centres from a purple**  
28 **photosynthetic bacterium, producing macromolecular chimeras that display mechanisms of**  
29 **polychromatic solar energy harvesting and conversion not present in natural systems. Our**  
30 **findings illustrate the power of a synthetic biology approach in which bottom-up construction of**  
31 **a novel photosystem using naturally disparate but mechanistically complementary components**  
32 **is achieved in a predictable fashion through the genetic encoding of adaptable, plug-and-play**  
33 **covalent interfaces.**

34

## 35 **Main**

36 Our everyday experience of photosynthesis is dominated by the blue/red-absorbing pigment  
37 chlorophyll, a magnesium tetrapyrrole that acts as both a harvester of solar energy and a carrier of  
38 electrons and holes. Variants of this versatile molecule, principally chlorophyll *a* and chlorophyll *b*,  
39 are found in the plants, algae and cyanobacteria that make up the oxygenic phototrophs. Less well-  
40 known are the anoxygenic phototrophs, bacteria that use electron donors other than water and  
41 have one or more variants of bacteriochlorophyll as their principal photosynthetic pigment.  
42 Although these bacteria are less obvious in our environment, oxygen-tolerant species are  
43 widespread in oceanic surface waters where they make a sizeable contribution to global solar  
44 energy conversion<sup>1</sup>. A few species, including the bacteriochlorophyll *a*-containing *Rhodobacter*  
45 (*Rba.*) *sphaeroides*, have played major roles in our understanding of excitation energy transfer in  
46 light harvesting “antenna” complexes (LHCs)<sup>2-4</sup> and charge separation in photochemical reaction  
47 centres (RCs)<sup>5,6</sup>.

48 Improving the performance of photosynthesis and finding new ways to exploit natural solar  
49 energy conversion have become important research topics<sup>7,8</sup>, and there is growing interest in the  
50 use of photosynthetic proteins as environmentally-benign components in biohybrid devices for solar

51 energy conversion<sup>9–14</sup>. Photoexcitation of a RC in such a device triggers intra-protein charge  
52 separation, producing a potential difference between opposite “poles” of the protein that drives  
53 subsequent electron transfer to create a photocurrent and photovoltage. In addition to solar energy  
54 conversion *per se*, proposed applications of photoprotein devices have included biosensing,  
55 light/UV sensing, touch sensing and solar fuel synthesis<sup>9–16</sup>. Photosynthetic proteins are attractive  
56 as device components because they are environmentally sustainable and benign, they achieve solar  
57 energy conversion with a very high quantum efficiency (charges separated per photon absorbed),  
58 and they can be adapted to purpose through protein engineering. However, a limitation is their  
59 selective use of available solar energy<sup>7,8</sup>, a consequence of their particular palette of light harvesting  
60 pigments (Fig. 1a). This can be evidenced in devices through the recording of action spectra of  
61 external quantum efficiency (EQE – the number of charges transferred per incident photon), which  
62 exhibit peaks and troughs that correspond to the absorbance spectra of the particular light  
63 harvesting pigments that are coupled to charge separation in the device<sup>12,17–21</sup>.

64 One option for the expansion of a protein’s light harvesting capacity is to attach to it  
65 chromophores such as synthetic dyes<sup>22–24</sup> or emissive nanoparticles<sup>25–27</sup>. Drawbacks of this  
66 approach are that synthetic dyes are often expensive and prone to photobleaching<sup>26</sup>, whilst  
67 fluorescent nanoparticles can be toxic and achieving well-controlled assembly of protein-  
68 nanoparticle conjugates is challenging<sup>28</sup>. More akin to the present study is a report of a fusion  
69 protein between a single Yellow Fluorescent Protein (YFP) and the purple bacterial RC, which has  
70 the effect of somewhat enhancing light harvesting in a region where RC absorbance is weak by  
71 adding a single chromophore<sup>29</sup>.

72 A striking observation is the complementary nature of the absorbance spectra of chlorophyll  
73 and bacteriochlorophyll photosystems (Fig. 1a). This is enabled by the somewhat different  
74 electronic structures of their principal pigments (Supplementary Fig. S1a) and facilitates the  
75 occupancy of complementary ecological niches by oxygenic and anoxygenic phototrophs.  
76 Chlorophyll absorbs most strongly in the blue and red whereas the absorbance of  
77 bacteriochlorophyll is shifted to the near-ultraviolet and near-infrared. The absorbance spectra of  
78 plant and bacterial carotenoids between 400 and 600 nm are also somewhat complementary (Fig.  
79 1a). Thus, anoxygenic phototrophs harvest parts of the solar spectrum which oxygenic phototrophs  
80 do not absorb well, and *vice versa*.

81 Following nature’s lead, here we present the use of genetic encoding to achieve *in vitro* self-  
82 assembly, from diverse components (Fig. 1b,c), of novel photoprotein “chimeras” that display

83 polychromatic solar energy harvesting and conversion. The components are the *Rba. sphaeroides*  
84 RC<sup>5,6</sup> and the LHCII<sup>30–33</sup> and heterodimeric LHCI<sup>34–38</sup> proteins from *Arabidopsis (A.) thaliana*  
85 (Supplementary Fig. S1b-e). Highly specific and programmable self-assembly is achieved through  
86 adaptation of these components with the constituents of a two-component protein interface  
87 domain (Supplementary Fig. S1f) that covalently locks together two photosynthetic membrane  
88 proteins that have no natural propensity to associate in a specific and/or controllable manner. The  
89 resulting macromolecular, adaptable chimeric photosystems have defined compositions, and  
90 display novel mechanisms of solar energy conversion across the near-UV, visible and near-IR.

91

## 92 **Results**

### 93 **Solar energy conversion by unadapted photosystem components**

94 We first looked at whether plant LHCII can pass harvested energy to purple bacterial RCs in dilute  
95 solution in the absence of complementary genetic adaptations to promote specific  
96 heterodimerisation (complexes defined as “unadapted”). On receipt of excitation energy,  
97 photochemical charge separation in the *Rba. sphaeroides* RC is a rapid four-step process (Fig. 1d)  
98 that produces a metastable oxidised primary electron donor (P870<sup>+</sup>) and reduced acceptor  
99 ubiquinone (Q<sub>B</sub><sup>-</sup>); energy transfer can therefore be detected as a quenching of LHC emission  
100 accompanied by an enhancement of P870 oxidation. Although bacterial RCs and plant LHCII (see  
101 Methods for sources) have overlapping absorbance and emission spectra between 640 nm and 800  
102 nm (Fig. 1b) no appreciable energy transfer was observed when wild-type (WT) RCs were mixed in  
103 solution with an LHCII because they have no capacity for binding to one another. The addition of  
104 purified wild-type (WT) RCs did not significantly reduce emission from LHCII (Fig. 2a) and photo-  
105 oxidative bleaching of the absorbance band of this RC’s P870 primary electron donor BChls in  
106 response to 650 nm excitation was not significantly enhanced by the addition of LHCII (Fig. 2b),  
107 which absorbs strongly at this wavelength (Fig. 1b).

108 In comparison to LHCII, the spectral overlap ( $J$ ) between LHC emission and RC absorbance is  
109 ~80 % larger in the case of LHCI (Fig. 1c and Supplementary Table S1) which contains a pair of “red-  
110 form” chlorophyll *a* that possess a charge-transfer state that mixes with the low energy exciton  
111 state<sup>38</sup>. Although the addition of WT RCs did bring about a decrease in LHCI emission (Fig. 2a) there  
112 was no associated significant increase in RC P870 photobleaching in the presence of LHCI (Fig. 2c),  
113 leading to the conclusion that the observed emission quenching was not due to energy transfer.



114 Protein concentrations used for the fluorescence measurements were too low (max absorbance <  
115 0.07) for this drop in LHCI emission to be attributable to reabsorption by the added RCs, and an  
116 equivalent drop was not seen for LHCII and WT RCs at similar concentrations (Fig. 2a). As it is known  
117 that the emission quantum yield of LHCI *in vitro* is much more sensitive to its environment than is  
118 the case for LHCII<sup>36</sup>, the observed drop in LHCI emission on adding WT RCs is attributed to a change  
119 in its intrinsic quantum yield rather than being a signature of energy transfer.

120 Although no significant energy transfer was seen between these proteins in dilute solution, to  
121 establish the principle that plant LHCs can pass energy to bacterial RCs when brought sufficiently  
122 close together mixtures of LHC and WT RC proteins were adhered to a nanostructured silver cathode  
123 and their capacity for generating photocurrents examined (see Materials and Methods). In this  
124 photoelectrochemical system (Fig. 2d) cytochrome *c* (cyt *c*) is used to “wire” charge separation in  
125 the RC to the cathode, and ubiquinone-0 (Q<sub>0</sub>) shuttles electrons to the counter electrode<sup>20,39,40</sup>.  
126 Electrodes drop-cast with purified WT RCs produced a photocurrent in response to RC-specific 870  
127 nm light and a weaker current in response to 650 nm excitation where RC absorbance is very low  
128 (Supplementary Fig. S2a). An external quantum efficiency (EQE) action spectrum showed good  
129 correspondence with the RC absorbance spectrum, confirming that the photocurrent was  
130 attributable to light capture by the pigments of the RC (Fig. 2e, black versus red). As expected, an  
131 electrode fabricated with purified LHCII failed to show any photocurrent response during 650 nm  
132 excitation of the main low-energy LHCII absorbance band (Supplementary Fig. S2a).

133 For electrodes fabricated from mixtures of WT RCs and LHCs, in addition to the expected RC  
134 bands the EQE spectra contained a component between 620 and 700 nm that corresponded to the  
135 low-energy absorbance band of LHCII or LHCI (Fig. 2e, green and full spectra can be found in  
136 Supplementary Fig. S3a). A contribution from the high energy Soret absorbance band of LHCII or  
137 LHCI was also observed in EQE spectra (Supplementary Fig. S4b,e,f). This demonstrated that  
138 bacteriochlorophyll-based purple bacterial RCs can utilize chlorophyll-based plant LHCs for energy  
139 harvesting, producing charge separation and a photocurrent response, provided they are brought  
140 within Förster resonance energy transfer (FRET) distance of one another. In this case this was  
141 realised by colocalising the two proteins on the surface of a biophotocathode.

142

#### 143 **Design and production of component for chimeric photosystems**

144 In an attempt to activate chlorophyll to bacteriochlorophyll energy transfer in dilute solution, RCs  
145 and LHCs were adapted using the SpyTag/SpyCatcher protein fusion system<sup>41</sup> as a programmable

146 interface. When mixed in solution, highly-specific binding of the short SpyTag peptide to the  
147 SpyCatcher protein domain initiates autocatalysis of an isopeptide bond between the two involving  
148 aspartate and lysine residues (Supplementary Fig. S1f), producing a single, covalently-locked, water-  
149 soluble protein domain<sup>41</sup>.

150 To adapt the RC for LHC binding an optimized version of SpyCatcher<sup>42</sup>, 106 amino acids in  
151 length (SpyCatcher $\Delta$ ), was attached to the N-terminus of the RC PufL protein either directly (dubbed  
152 “RCC”) or via a four residue linker (dubbed “RC4C”) (Fig. 3a and Supplementary Table S2). Adapted  
153 RC proteins were expressed in *Rba. sphaeroides*. For LHCI, Lhcb apoproteins were expressed in *E.*  
154 *coli* and mature pigment-protein monomers refolded *in vitro* with purified pigments<sup>43–46</sup>. Three  
155 LHCI proteins were designed (Fig. 3b; see Supplementary Fig. S5a for protein sequences). The first,  
156 dubbed “dLHCI”, lacked twelve dispensable N-terminal amino acids that are not resolved in  
157 available X-ray crystal structures<sup>30–32</sup> and had a His-tag at its C-terminus. The remaining two had  
158 either a truncated SpyTag variant (SpyTag $\Delta$ ) added to the N-terminus of the truncated Lhcb1  
159 (termed Td-dLHCI) or the full SpyTag sequence added to the C-terminus of the full Lhcb1 (termed  
160 LHCI-T) (Fig. 3b).

161 Adapted heterodimeric LHCI proteins (Fig. 3c; see Supplementary Fig. S5a for protein  
162 sequences) were also refolded from apoproteins expressed in *E. coli*<sup>34,38,47,48</sup>. This involved mixing  
163 SpyTag $\Delta$ -adapted Lhca4 protein (Td-L4) with either unadapted Lhca1 protein (L1) or SpyTag $\Delta$ -  
164 adapted Lhca1 protein (Td-L1), to produce LHCI either singly or doubly modified with SpyTag $\Delta$   
165 (termed LHCI-Td and Td-LHCI-Td, respectively). This enabled the creation of chimeras between LHCI  
166 and either one or two RCs.

167

### 168 **Self-assembly of RC-LHC chimeras**

169 Following ultracentrifugation, purified RCs and LHCIIs could be visualised on sucrose density  
170 gradients as either a red or green band, respectively (Fig. 3d, gradients 1,2), and these two proteins  
171 also migrated separately in gradients loaded with a mixture with only either SpyTag or SpyCatcher  
172 adaptations (Fig. 3d, gradients 3,4). In contrast, mixing any SpyCatcher $\Delta$ -adapted RC with any  
173 SpyTag( $\Delta$ )-adapted LHCI produced a product, dubbed a “chimera”, that migrated further than  
174 either monomeric protein. The two examples shown in Fig. 3d (gradients 5,6) are chimeras from a  
175 RC4C/Td-dLHCI mix (dubbed “RC#LHCI”) and from a RCC/LHCI-T mix (dubbed “LHCI#RC”). The  
176 symbol “#” denotes the spontaneously-formed SpyCatcher/SpyTag interface domain. Chimera  
177 formation could also be detected on a native blue gel (Supplementary Fig. S6a). SDS-PAGE combined

178 with western blotting using anti-His antibodies confirmed that chimera self-assembly was due to  
179 the formation of a covalent bond between the SpyTag( $\Delta$ )-adapted Lhcb1 polypeptide of LHCII and  
180 the SpyCatcher $\Delta$ -adapted PufL polypeptide of the RC (Supplementary Fig. S6b). The reaction half-  
181 time for chimera formation varied between 10 and 90 mins depending on the particular  
182 combination of adapted RC and LHCII (detailed in Supplementary Section 1).

183 LHCI-RC chimeras could also be assembled by incubation of LHCI-Td or Td-LHCI-Td with a  
184 three-fold excess of RCC. This again produced higher molecular weight products that could be  
185 separated from unreacted RCs on blue native gels (Fig. 3e). As designed, assembly of RCC with  
186 doubly-adapted Td-LHCI-Td complexes produced higher molecular weight products than with singly-  
187 adapted LHCI-Td complexes (Fig. 3e, right). Equivalent results were obtained with LHCI adapted with  
188 the full SpyTag and also with RC4C (Supplementary Fig. S7a). Analysis by SDS-PAGE and western  
189 blotting showed that chimera self-assembly was due to formation of a covalent bond between the  
190 SpyCatcher $\Delta$ -adapted PufL of the RC and Lhca4 of a singly SpyTag $\Delta$ -adapted LHCI (to form chimera  
191 LHCI#RC) or Lhca4 and Lhca1 of a doubly SpyTag $\Delta$ -adapted LHCI (to form chimera RC#LHCI#RC)  
192 (Supplementary Fig. S7b). Sucrose density gradient ultracentrifugation (Fig. 3f) showed that LHCI#RC  
193 chimeras (gradient 5) were clearly larger than LHCI alone (gradients 2-4) or unadapted RCs  
194 (gradients 1,3,4), and RC#LHCI#RC chimeras (gradient 6) were larger again.

195 Covalent-locking of the structure enabled purification of all LHCI-RC and LHCII-RC chimeras by  
196 a combination of nickel affinity and size-exclusion chromatography, absorbance spectroscopy being  
197 used to identify fractions containing protein oligomers with the designed molar ratio  
198 (Supplementary Fig. S8).

199 A change in protein morphology on chimera formation could be observed by transmission  
200 electron microscopy (TEM). Images of a mix of unadapted WT RCs and dLHCII showed a large  
201 number of monodispersed, regularly-sized objects of <10 nm diameter (Fig. 3g, top/left), whereas  
202 images of the purified LHCII#RC chimera revealed two-domain objects (Fig. 3g, top/right). The  
203 purified LHCI#RC and RC#LHCI#RC chimeras presented as objects with a more elongated  
204 morphology owing to the presence of one or two RCs and the heterodimeric LHCI (Fig. 3g, bottom).  
205 Molecular models of these chimeras, based on available X-ray crystal structures for the RC, LHCII,  
206 LHCI and SpyCatcher/Tag, are shown in Fig. 3h and 3i.

207

208

209

## 210 **Chlorophyll to bacteriochlorophyll energy transfer in chimeras**

211 In solution, LHCII emission was quenched within each chimera in comparison to a control sample  
212 formed from an equivalent mix of the SpyTag-adapted LHCII and WT RCs (Fig. 4a; see spectra and  
213 other combinations in Supplementary Fig. S9). This was indicative of energy transfer, likely through  
214 a FRET mechanism at the distances implied by the chimera models (Fig. 3h,i), that was activated in  
215 these proteins in dilute solution by physically-linking the RC to the LHCII. These trends, observed  
216 with 650 nm excitation, were also seen in data on the same complexes obtained with other three  
217 excitation wavelengths, with no variation in emission spectrum line-shape (Supplementary Fig. S9).  
218 As well as being diagnostic of correctly refolded LHCII proteins, this lack of dependence of emission  
219 spectrum on excitation wavelength showed that the reduction in LHCII emission on chimera  
220 formation was not due to parasitic RC absorbance, which would be expected to be wavelength  
221 dependent (and also seen when WT RCs were mixed with each LHCII).

222 To determine the fate of transferred energy, measurements of RC P870 photo-oxidation in  
223 response to 650 nm excitation were carried out on the LHCII#RC and RC#LHCII chimeras and fitted  
224 to a simple interconversion reaction (Eq. 1; all parameters are summarized in Supplementary Table  
225 S3). Bleaching of 870 nm absorbance was stronger in LHCII#RC chimeras than in controls comprising  
226 the RCC protein alone or a mixture of RCC with unadapted dLHCII complexes (Fig. 4c). The same was  
227 found for the RC#LHCII chimera (Supplementary Fig. S10a). Hence, decreased emission by the LHCII  
228 energy donor was accompanied by enhanced photo-oxidation of the RC energy acceptor, confirming  
229 energy transfer between the two proteins in solution that was switched on only after linking them  
230 by the SpyCatcher/Tag domain.

231 Turning to LHCI, a greater reduction of LHCI emission was seen on forming either LHCI#RC or  
232 RC#LHCI#RC chimeras than after mixing the same adapted LHCI proteins with WT RCs (Fig. 4b; and  
233 other combinations are shown in Supplementary Fig. S11). This effect was again seen to be  
234 independent of excitation wavelength (Supplementary Fig. S11a) showing it was not due to the  
235 absorbance of excitation light by the tethered RC(s). This emission quenching was accompanied by  
236 significant enhancement of P870 photo-oxidation in LHCI chimeras with one or two RCC, compared  
237 to that seen with RCC alone (Fig. 4d), confirming energy transfer. Doubly modified RC#LHCI#RC  
238 complexes showed less P870 bleaching than LHCI#RC complexes due to two tethered RCs competing  
239 for the exciton reservoir rather than one (see Supplementary Section 4 for more detail on the  
240 double-acceptor/single-donor FRET scheme).

241 Purified chimeras were also adhered to nanostructured silver electrodes to test their  
242 functionality. All were able to generate photocurrents, showing that dynamic interactions between  
243 the RC, cyt *c* and ubiquinone at the electrode surface, required for the generation of a photocurrent,  
244 were not obstructed by attaching the RC to LHCII or LHCI. All EQE action spectra recorded for  
245 chimeras exhibited low energy (Fig. 4e,f) and high energy chlorophyll bands (Supplementary Fig.  
246 S4c,d,g,h, green shading) indicating photocurrent generation powered by LHC absorbance.

247

### 248 **Energy transfer efficiency in chimeras**

249 Apparent efficiencies of energy transfer from LHCII or LHCI to the RC in solution were estimated  
250 either from data on emission of the LHC energy donor ( $E_{FL}$ ) or from data on photo-bleaching of the  
251 RC energy acceptor ( $E_{P870}$ ) (see Materials and Methods, Eqs. 2-4). Efficiency  $E_{FL}$  was based on the  
252 additional quenching of LHC emission in a chimera relative to that in a compositionally-matched  
253 mixture of the relevant LHC variant and WT RCs (Eq. 2,3) or additional quenching in a LHC/WT RC  
254 mixture relative to that in a concentration-matched LHC-only sample. Efficiency  $E_{P870}$  was based on  
255 the enhanced rate of RC P870 photobleaching in a chimera relative to a matched RC-only control  
256 (Eq. 4).

257 Values of  $E_{P870}$  calculated from experimental data are shown in Table 1. The efficiency of  
258 energy transfer was low in mixtures of WT RCs with SpyTag adapted LHCII or LHCI, consistent with  
259 expectations for a dilute (500 nM) solution of two proteins with no propensity to associate (see  
260 Supplementary Fig. S12 and Supplementary Table S4 for other control combinations). In marked  
261 contrast,  $E_{P870}$  was over 20 % in the corresponding RC-LHCII or RC-LHCI chimera (Table 1). For all  
262 chimeras the value of  $E_{FL}$  derived from LHC emission data was in excellent agreement with the values  
263 of  $E_{P870}$  derived from RC absorbance data (Table 1). This correspondence between independently-  
264 determined efficiencies from separate data sets reinforced the conclusion that energy transfer was  
265 taking place from the plant LHCs to the bacterial RCs within the chimera.

266 “On electrode” apparent energy transfer efficiencies ( $E_{electrode}$ ) were also determined from the  
267 EQE action spectra, as described in Materials and Methods. In general, values of  $E_{electrode}$  were higher  
268 than either estimate of energy transfer efficiency in solution (Table 1). This was particularly striking  
269 for mixtures of WT RCs and SpyTag( $\Delta$ )-adapted LHCII or LHCI (shown schematically in Fig. 4g) where  
270 energy transfer in solution had a very low apparent efficiency. However, for the RC/LHCII chimeras  
271 in particular the value of  $E_{electrode}$  was also substantially higher than  $E_{P870}$  or  $E_{FL}$  (Table 1 and Fig. 4h),  
272 suggesting that adhering the chimeras to a surface turned on inter-chimera ET that supplemented

273 the intra-chimera ET also observed in solution. This effect was less pronounced for the RC/LHCI  
274 chimeras, particularly for complex RC#LHCI#RC where there were already two RCs per LHCI antenna  
275 (Table 1).

276 To examine whether the benefits of pre-linking RCs and LHCs in a chimera would be enhanced  
277 across a range of packing densities, a 2D Monte Carlo simulation was carried out as detailed in  
278 Supplementary Sections 2 and 3 (and summarized in Supplementary Fig. S13). In this either LHCII#RC  
279 chimeras or a mixture of LHCII-T and WT RC proteins were represented as hard-discs on a 2D surface  
280 and centre-to-centre distances calculated as a function of packing density. The outcome of this  
281 simulation was an apparent energy transfer efficiency ( $E_{sim}$ ) based on how protein packing densities  
282 affected mean inter-protein distances (Fig. 4i). In the high packing regime,  $E_{sim}$  was in good  
283 agreement with the slightly higher  $E_{electrode}$  determined from chimeras than a mixture of unadapted  
284 proteins. As the packing density dropped to a low value (right to left in Fig. 4i),  $E_{sim}$  for the chimeras  
285 gradually declined to around the estimates of  $E_{P870}$  and  $E_{FL}$  for the LHCII#RC chimera in solution  
286 (22.8%/19.6%). In contrast,  $E_{sim}$  for the protein mixture declined steeply to less than 2% at the lowest  
287 packing density, again in agreement with estimates of  $E_{P870}$  and  $E_{FL}$  for the protein mixture in  
288 solution (1.2%/0.8%). This reinforced the conclusion that pre-tethering of the RC and LHCII protein  
289 into a chimera brought an added benefit even under conditions where co-localisation of the proteins  
290 on a surface switched on energy transfer between the two irrespective of tethering. Presumably  
291 pre-tethering can mitigate against situations where, for example, formation of RC-rich or LHCII-rich  
292 sub-domains and sub-optimal mixing can lead to some proteins being outside the FRET distance  
293 (Supplementary Fig. S14, marked with blue triangles).

294 The EQE spectra were also used to estimate the percentage improvement in the use of visible  
295 light by an LHC/RC bio-photoelectrode compared to a RC bio-photoelectrode. Consistent with values  
296 of  $E_{electrode}$ , the presence of an LHC consistently boosted the use of visible light, with the strongest  
297 effects seen for electrodes fabricated from chimeras.

298

## 299 Discussion

300 The data establish that it is possible to genetically encode *in vitro* self-assembly of a hybrid  
301 chlorophyll/bacteriochlorophyll solar energy conversion system using a highly-specific split-  
302 interface domain. To our knowledge such combinations of chlorin and bacteriochlorin pigments are  
303 not used for light harvesting in nature, although in green sulphur bacteria the multiple BChl *a* light  
304 harvesting and electron transfer cofactors of the RC are supplemented by four molecules of Chl *a*



305 that are used electron acceptors during charge separation<sup>49</sup>. In a similar vein, in the related  
306 heliobacterial RC the multiple BChl *g* (an isomer of Chl *a*) cofactors are supplemented by two  
307 molecules of 8<sup>1</sup>-hydroxychlorophyll *a* that also act as electron transfer acceptors<sup>50</sup>. Hence some  
308 organisms have evolved to supplement bacteriochlorin cofactors with chlorins to achieve charge  
309 separation, but not to expand solar energy harvesting in the way demonstrated here.

310 The SpyCatcher/Tag system provided a versatile means of constructing self-assembling hybrid  
311 photosystems. LHCII could be modified with SpyTag at either its N- or C-terminus, and by also using  
312 heterodimeric LHCI proteins that were either singly or doubly SpyTag modified the oligomeric state  
313 of the chimeras could be varied between heterodimers (RC#LHCII and LHCII#RC), heterotrimers  
314 (LHCI#RC) and heterotetramers (RC#LHCI#RC). The SpyCatcher/Tag linking domain produced  
315 predictable and stable products due to its very high partner specificity and the autocatalytic  
316 formation of a locking covalent bond. This binding reaction, which under the present conditions was  
317 found to have a half time of between 10 and 90 minutes, was irreversible, relatively insensitive to  
318 reaction conditions and was free of side products (i.e. a failed reaction did not lead to depletion of  
319 reactants). The assembly strategy used, using *E. coli* and *Rba. sphaeroides* as separate bacterial  
320 factories for the synthesis of protein components that could be assembled *in vitro*, avoided the need  
321 to re-engineer a host organism to be able to produce both chlorophyll and bacteriochlorophyll (and  
322 different types of carotenoid). This methodology therefore provides a route for the bottom-up  
323 redesign of a photosystem *in vitro* despite the challenges of working with large, multi-component  
324 integral membrane complexes.

325 The mechanism of solar energy conversion operating in the chimeras, based on the well-  
326 understood photophysical properties of the component proteins, is summarised in Fig. 5. Energy  
327 captured by the pigment systems of LHCII or LHCI will be passed to the RC in a downhill manner,  
328 exciting the primary electron donor bacteriochlorophylls (P870\*) and initiating charge separation to  
329 form P870<sup>+</sup>Q<sub>B</sub><sup>-</sup>. Energy harvested by the chlorophyll *b* (or carotenoid – not shown) pigments of either  
330 LHC is passed to the lower energy chlorophyll *a*. Inter-protein energy transfer is likely to involve a  
331 sub-set of red-shifted chlorophyll *a* in either LHC and entry of energy into the RC is likely to occur  
332 principally via the bacteriopheophytin cofactors (H<sub>A/B</sub>) as their absorbance has the greatest spectral  
333 overlap with LHC emission (Fig. 1b,c).

334 As evident from comparing Fig. 1c with Fig. 1b, LHCI exhibits a red-enhanced fluorescence that  
335 produces a ~80% stronger spectral overlap with RC absorbance (factor *J* in Supplementary Table S1)  
336 compared to LHCII. Despite this, the efficiency of ET in the LHCI#RC chimera was not significantly

337 higher than that in either the LHCII#RC or RC#LHCII chimera. This is likely due to the reconstituted  
338 LHCI heterodimers being in a partially quenched state<sup>48,51</sup> that reportedly reduces their quantum  
339 yield to only 29 % of that of LHCII<sup>36</sup>, so counteracting the potential benefits of an enhanced spectral  
340 overlap. In agreement with this our estimates of quantum yield were 30% for LHCI-Td and 28% for  
341 Td-LHCI-Td (Supplementary Table S1). In future work it might be possible to partially overcome this  
342 through SpyTag modification of LHCI in a native organism, as the quantum yield of purified native  
343 LHCI has been reported to be ~64% that of LHCII, more than double that of recombinant LHCI<sup>36</sup>.

344 Estimates of ET efficiency in RC#LHCI#RC chimeras in solution were consistently higher than  
345 those for the LHCI#RC chimera (parameters  $E_{P870}$  and  $E_{FL}$  in Table 1), consistent with the presence of  
346 two ET acceptors in the former. Estimates of the ET efficiency to the second RC added to Lhca1 in  
347 RC#LHCI#RC, made using Eq. 5, yielded values that were either 50 % or 69 % of that for transfer to  
348 the first RC attached to Lhca4. This is consistent with the presence of a relatively low energy red-  
349 form chlorophyll *a* dimer in the Lhca4 subunit (Supplementary Fig. S1d) that is responsible for the  
350 red-enhancement of the LHCI emission spectrum<sup>36,38,47,48</sup>, and which may have produced more  
351 efficient ET to the RC attached to Lhca4 than that attached to Lhca1.

352

## 353 **Conclusions**

354 This work shows that genetically adapting two diverse photosynthetic membrane proteins with the  
355 components of an extramembrane interface domain enables *in vitro* self-assembly of a chimeric  
356 photosystem in which UV/near-IR solar energy conversion by a bacteriochlorophyll-based RC is  
357 augmented by visible light capture by chlorophyll-based LHCs. This approach inspired by a concept  
358 of synthetic biology, to adapt naturally incompatible biological modules to interface in a  
359 standardized way through genetic encoding, creates covalently stabilised macromolecular  
360 photosystems that are predictable and programmable. In addition to providing novel  
361 photosynthetic structures and energy transfer pathways to explore, these polychromatic  
362 photosystems constitute interesting new materials for biohybrid devices that in recent years have  
363 expanded in application beyond photoelectrochemical solar energy conversion to fuel molecule  
364 synthesis, energy storage, biosensing, touch sensing and photodetection. Finally, the demonstrated  
365 flexibility with which RCs and LHCs could be interfaced opens the possibility of constructing more  
366 elaborate, self-assembling chimeric photosystems that employ multiple orthogonal linking  
367 modules<sup>52,53</sup> and a wider range of photosynthetic and redox proteins that, despite being separated

368 by billions of years of evolution, can be adapted for future solar energy conversion through genetic  
369 programming of standardized interfaces.

370

### 371 **Acknowledgements**

372 The Lhcb1.3 plasmid was a kind gift from Prof. Roberta Croce of the Vrije Universiteit Amsterdam,  
373 The Netherlands. We also thank Dr. Majid Mosayebi from the School of Mathematics, University of  
374 Bristol for generous advice on simulations. J.L and M.R.J acknowledge funding from the  
375 EPSRC/BBSRC Synthetic Biology Centre for Doctoral Training (EP/L016494/1) and from the  
376 BrisSynBio Synthetic Biology Research Centre at the University of Bristol (BB/L01386X/1). R.N.F  
377 acknowledges support from the Netherlands Organisation for Scientific Research (NWO) for a Vidi  
378 grant, and V.M.F for funding from NWO Veni project 16866.

379

### 380 **Author contributions**

381 J.L and M.R.J conceived the research. J.L engineered the chimeras, characterised binding and energy  
382 transfer and conducted the simulations. V.M.F and J.L carried out photochronoamperometry under  
383 supervision from R.N.F. J.L and M.R.J drafted the manuscript and all authors commented on the  
384 manuscript. M.R.J supervised the project.

385

### 386 **Competing interests**

387 The authors declare no competing interests.

388

### 389 **Methods**

390 **RC modification and purification.** SpyCatcher $\Delta$ , a version of the SpyCatcher protein lacking nine C-  
391 terminal amino acids that are not resolved in the X-ray crystal structure of SpyCatcher/SpyTag<sup>42</sup> was  
392 used in order to reduce the length of the linking peptide between the main bodies of the RC and  
393 SpyCatcher proteins. It was fused to the N-terminus of the RC PufL polypeptide, which is an alanine  
394 exposed at the protein surface on the cytoplasmic side of the membrane (white spheres in  
395 Supplementary Fig. S1a), either directly or via a four (SESG) amino acid linker, and was preceded by  
396 a His-tag for purification (Fig. 3a). Nomenclature used for these and all other component proteins  
397 and chimeras are summarised in Supplementary Table S2. The required plasmids were constructed  
398 using synthetic DNA (Eurofins). The WT RC control was also modified with a His tag for purification

399 as described previously<sup>54</sup>. All RCs were expressed in a strain of *Rba. sphaeroides* engineered to lack  
400 light harvesting complexes<sup>54,55</sup>, were purified by nickel affinity chromatography and gel filtration<sup>54</sup>,  
401 and were stored at -80 °C as a concentrated solution in 20 mM Tris (pH 8.0)/0.04 % DDM (Tris/DDM  
402 buffer).

403

404 **LHCII modification, refolding and purification.** To enable low-cost and rapid genetic modification  
405 of plant LHCII the designed apoproteins were expressed in *E. coli* and the mature pigment-proteins  
406 refolded in DDM using pigments purified from spinach according to a well-established protocol<sup>43</sup>.  
407 Designs of the modified LHCII are outlined in Fig. 3b and Supplementary Fig. S5a. Complex dLHCII  
408 lacked twelve dispensable N-terminal amino acids (Supplementary Fig. S1d). This sequence, which  
409 includes four basic amino acids, is involved in stacking of thylakoid grana but can be removed  
410 without affecting core LHCII light-harvesting function<sup>31</sup>. Their removal minimised the sequence  
411 linking the main body of LHCII (starting at serine 14) to additional components added at the N-  
412 terminus. In the second construct a truncated SpyTag $\Delta$  was added to the N-terminus of dLHCII to  
413 form Td-dLHCII. This modified SpyTag $\Delta$  lacked three dispensable amino acids at its C-terminus<sup>42</sup>,  
414 further reducing the linker to the N-terminus of LHCII. In the third construct the full 13 amino acid  
415 SpyTag peptide was added to the C-terminus of Lhcb1 after a three amino acid linker (termed LHCII-  
416 T). In all cases a His-tag placed adjacent to the SpyTag sequence ensured the latter was retained in  
417 the final, purified pigment-protein (Fig. 3b). A fourth LHCII with the full SpyTag on the N-terminus  
418 of the truncated Lhcb1 was also constructed (T-dLHCII) but gave identical results to Td-dLHCII  
419 (shown in Supplementary Fig. S5 and data shown in some other supplementary Figures).

420 The starting point for production of the designed LHCII holoprotein was a pET-28a expression  
421 vector containing a gene encoding the Lhcb1.3 protein from *Arabidopsis thaliana* (UniProtKB entry  
422 P04778), that was a kind gift from Prof. Roberta Croce, Vrije Universiteit Amsterdam. Modification  
423 of this gene was carried out by Gibson assembly using oligonucleotides sourced from Eurofins or  
424 using the Q5<sup>®</sup> Site-Directed Mutagenesis Kit from NEB. Designed apoproteins were expressed in *E.*  
425 *coli* Rosetta<sup>™</sup> 2 (Novagen), purified from inclusion bodies, and the mature pigment-protein  
426 assembled *in vitro* using purified chlorophyll *a*, chlorophyll *b* and carotenoid pigments with DDM as  
427 the supporting detergent, according to a previously published protocol<sup>43</sup> with exception that  $\beta$ -  
428 mercaptoethanol was replaced by dithiothreitol (DTT). Pigments were purified as described  
429 previously<sup>43</sup> with the exception that they were dried from acetone solution using a freeze drier

430 rather than a centrifugal vacuum concentrator. Pigment concentration and composition was  
431 determined in 80 % (v/v) acetone using published equations<sup>56</sup>.

432 Each refolded LHCII was first purified by nickel affinity chromatography and then by gel filtration  
433 chromatography. Fractions with the lowest  $A_{470}$  to  $A_{674}$  ratio and invariant emission profiles in  
434 response to 440 nm, 475 nm and 500 nm excitation were kept and pooled. Purified proteins were  
435 stored at  $-80^{\circ}\text{C}$  before use as concentrated solutions in Tris/DDM. An extinction coefficient at the  
436 chlorophyll *a*  $Q_y$  band of  $546,000 \text{ M}^{-1} \text{ cm}^{-1}$  was used to estimate LHCII concentration<sup>25</sup>.

437 The refolded LHCII complexes had absorbance spectra that were similar to one another  
438 (Supplementary Fig. S5b) and to spectra previously published by others<sup>43–46</sup>. Their emission spectra  
439 were highly similar (Supplementary Fig. S5c), and the line-shapes of these spectra were invariant  
440 with excitation wavelength (Supplementary Fig. S5d), a feature diagnostic of a structurally-intact  
441 LHCII. Pigment compositions were similar to those typically reported for recombinant LHCII  
442 (Supplementary Fig. S5e)<sup>46</sup>.

443

444 **LHCI modification, refolding and purification.** LHCI heterodimeric complexes were assembled from  
445 modified versions of *A. thaliana* proteins Lhca1 (UniProtKB entry Q01667) and Lhca4 (UniProtKB  
446 entry P27521). The mature Lhca1 was modified at its N-terminus either with a Myc protein  
447 purification affinity tag (termed L1) or with a Myc-tag followed by the shortened ten amino acid  
448 SpyTag $\Delta$  (termed Td-L1), and the mature Lhca4 was modified at its N-terminus with a His-tag  
449 followed by SpyTag $\Delta$  (termed Td-L4) (Fig. 3c and Supplementary Figure S5a). combining L1 or Td-L1  
450 with Td-L4 produced LHCI heterodimers with either one (LHCI-Td) or two (Td-LHCI-Td) SpyTag  
451 adaptations.

452 Expression plasmids were pET-28a containing synthetic genes sourced from Eurofins.  
453 Following apoprotein expression in *E. coli*, LHCI heterodimers were assembled by refolding with  
454 purified pigments in octyl glucoside (OG)<sup>34,36,38,47,48</sup>. A 20 % excess (by mass) of either L1 or Td-L1  
455 was mixed with Td-L4 to reduce the level of free Td-L4 monomer after refolding. The  
456 apoprotein:total pigment ratio was kept the same as for LHCII refolding. Nickel affinity  
457 chromatography was used to separate the His-tagged LHCI dimer from residual Lhca1 monomer  
458 (which was not His-tagged). Each LHCI was then further purified by gel filtration chromatography  
459 and stored at  $-80^{\circ}\text{C}$  before use as a concentrated solution in Tris/DDM. An extinction coefficient for  
460 the chlorophyll *a*  $Q_y$  band equal to  $1,092,000 \text{ M}^{-1} \text{ cm}^{-1}$  was used to evaluate LHCI concentration since  
461 its chlorophyll *a* content is approximately twice that of a refolded LHCII monomer<sup>34</sup>.

462

463 **Chimera formation and verification.** The standard approach to chimera formation was to mix RCs  
464 with a two-fold molar excess of LHCI, or a three-fold molar excess of LHCI, and then separate the  
465 chimera from unreacted components by gel filtration chromatography, using absorbance  
466 spectroscopy and each constituent molar extinction coefficient to assess the RC:LHC molar ratio in  
467 each column fraction (see Supplementary Fig. S8).

468 Formation of chimeras was initially verified by sucrose density gradient ultracentrifugation  
469 (Fig. 3d,f). Linear sucrose gradients were prepared by freezing and thawing 10 mL of 21 % (w/v)  
470 sucrose in 20 mM Tris/0.04% DDM (pH 8.0). Each gradient was loaded with 400  $\mu$ L of sample with  
471 each photoprotein at a concentration of 2.5  $\mu$ M and then capped with 1 mL of 20 mM Tris/0.04%  
472 DDM (pH 8.0). Gradients were ultracentrifuged in a Sorvall TH-641 swing-out rotor at 38,000 rpm  
473 for 18 hours at 4 °C.

474 The protocol for blue-native PAGE was adapted from one published previously<sup>57</sup>. Precast  
475 NativePAGE 4-20 % gels purchased from Thermo were run in a Bis-Tris buffer system. Coomassie  
476 blue dye at 0.02 % (w/v) was used in the cathode buffer but not in the loading buffer. The gel  
477 cassette was placed in an ice bath and run at 150 V for 1 h followed by 250 V for 2 h.

478 SDS-PAGE was carried out using precast 4-20 % gradient gels (Bio-Rad). A standard loading of  
479 20 pmol RC was used. Loaded gels were run at 200 V for 45 mins and stained overnight at room  
480 temperature with Quick Coomassie Stain (Generon™).

481 Western blotting was carried out following protein transfer onto a nitrocellulose membrane  
482 (GE Healthcare) on a TE 77 PWR Semi-Dry Transfer Unit (45 mA/gel and 30 min with a NOVA Blot  
483 kit) in 30 mins. The membrane was blocked overnight with 5 % milk PBS-Tween (PBS/T) buffer and  
484 then incubated with horse radish peroxidase (HRP) conjugated antibodies in the same buffer for 1  
485 h. The membrane was developed using 1x LumiGLO(R) (CST®) after rinsing the membrane three  
486 times with PBS/T buffer. Finally, the result was recorded on an ODYSSEY imaging system (LI-COR  
487 Biosciences). Re-probing of the membrane was accomplished by stripping and a repeat process of  
488 incubation in 5 % milk PBS/T buffer. Stripping of membrane was achieved by incubating twice in  
489 mild stripping buffer (200 mM glycine, 0.1 % SDS (w/v), 1 % Tween 20 (v/v), pH 2.2) for 5 mins and  
490 twice in TBST buffer (50 mM Tris, 150 mM NaCl, 0.1 % Tween 20 (v/v), pH 7.6), before finally  
491 transferring in PBS/T.

492



493 **Spectroscopy.** Absorbance spectra were recorded on a Varian Cary60 spectrophotometer and  
494 emission spectra on a Varian Cary Eclipse Fluorimeter in nitrogen-gassed, freshly prepared  
495 Tris/DDM.

496 Photo-oxidation of the RC P870 primary electron donor was measured using an optical fibre  
497 attachment for the Cary60 and a four-way cuvette holder (Ocean Optics, Inc.). For excitation, light  
498 from a HL-2000 light source (Ocean Optics, Inc.) was passed through an optical fibre and a 25 nm  
499 band-pass filter centred at 650 nm (Edmund Optics Ltd). Incident light intensity was approximately  
500  $0.1 \text{ mW cm}^{-2}$ , which excited  $\sim 15 \%$  of the RC population. Light-on/off was controlled using the  
501 electronic shutter on the light source triggered by a TGP110 pulse generator (Aim-TTi Ltd, UK). After  
502 incubation with a 10-fold excess of ubiquinone-0 (UQ<sub>0</sub>) in the dark for 10 mins, samples at a RC  
503 concentration of  $0.5 \mu\text{M}$  ( $0.25 \mu\text{M}$  with LHCI-Td) were housed in a 3 mm path length, four-sided  
504 micro cuvette (110-15-QS, Hellma<sup>®</sup> Analytics). Each measurement was repeated five times and the  
505 traces were fitted to a model assuming a simple interconversion between the ground and photo-  
506 oxidised state:

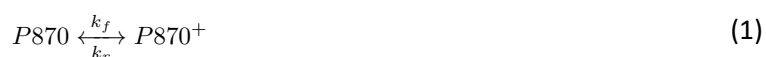

507  
508 Parameters  $k_f$  and  $k_r$  from these fits are shown in Supplementary Table S2. All control samples  
509 had equimolar LHC and RC except a WT RC/Td-LHCI-Td mix where the molar ratio of RC to LHC was  
510 two.

511  
512 **Quantum yield estimation.** The quantum yield of LHCs was determined by comparison to the dye  
513 DCM (4-(dicyanomethylene)-2-methyl-6-(4-dimethylaminostyryl)-4H-pyran; Sigma) dissolved in  
514 methanol. To avoid self-shading the absorbance of LHCs and DCM was set around 0.07 across the  
515 relevant spectral region (Supplementary Fig. S15a). Emission from DCM and LHCI<sub>H</sub> (average of 10  
516 measurements; Supplementary Figure S15b) was corrected for spectral response and used to  
517 calculate their relative integral photon fluxes<sup>58,59</sup>. The value for  $\Phi_D$  was estimated with reference to  
518  $\Phi_{DCM} = 0.435$ <sup>60</sup> and the refractive indices of water ( $n_{\text{water}} = 1.333$ ) and methanol ( $n_{\text{methanol}} = 1.328$ ).

519  
520 **Photochronoamperometry and EQE action spectra.** Nanostructured silver electrodes of 2 mm  
521 diameter were prepared as described previously<sup>20</sup>. Pigment-proteins at concentrations between 20  
522  $\mu\text{M}$  and  $100 \mu\text{M}$  were drop-casted onto prepared electrodes in the dark at  $4 \text{ }^\circ\text{C}$  for one hour and  
523 unbound protein was removed by repeated mechanically-controlled dipping in 20 mM Tris (pH 8) at

524 4 °C. Coated electrodes were immersed in 20 mM Tris (pH 8)/50 μM KCl/20 μM horse heart cyt *c*/1.5  
525 mM ubiquinone-0 (Q<sub>0</sub>) in a room temperature electrochemical cell fitted with an Ag/AgCl/3M KCl  
526 reference electrode and a platinum counter electrode. Photocurrents were measured at a bias  
527 potential of -50 mV vs Ag/AgCl, controlled by a PGSTAT128N potentiostat (Metrohm Autolab).  
528 Illumination was supplied by 870 nm or 650 nm LED (Roithner Lasertechnik) with irradiances of 32  
529 or 6.7 mW cm<sup>-2</sup>, respectively, at the electrode surface with about 50 nm FWHM (full width at half  
530 maximum) for both. EQE action spectra were recorded using a tungsten-halogen source passed  
531 through a monochromator (Supplementary Fig. S16a)<sup>20</sup>. All control samples had equimolar LHC and  
532 RC except a WT RC/Td-LHCI-Td mix where the molar ratio of RC to LHC was two.

533

534 **Transmission electron microscopy.** Negative stain TEM was carried out as described previously<sup>27</sup> on  
535 an equimolar mixture of 500 nM WT RCs and dLHCII, 500 nM LHCII#RC heterodimers, 100 nM  
536 LHCI#RC or 100 nM RC#LHCI#RC. Samples were stained with 3% uranyl acid (UA) and imaged with a  
537 FEI Tecnai 12 120kV BioTwin Spirit TEM.

538

539 **Estimation of energy transfer efficiency.** Apparent efficiencies of ET were calculated from LHC  
540 emission spectra ( $E_{FL}$ ) using:

$$E_{FL} = 1 - \frac{FL_{chimera}}{FL_{WTRC+LHC}} \quad (2)$$

541

542 where  $FL_{chimera}$  was the intensity of LHC emission in a chimera and  $FL_{WTRC+LHC}$  was that in a  
543 concentration-matched mixture of the appropriate LHCII or LHCI variant and the WT RC. A similar  
544 approach was used for estimating the apparent ET efficiency in mixtures of WT RCs and LHCII or  
545 LHCI, expressing  $FL_{WTRC+LHC}$  as a function of the emission of the same concentration of the LHC  
546 ( $FL_{LHC}$ ). For LHCII, where the line shape of the emission spectrum did not vary as it is a single quantum  
547 system<sup>61</sup>, maximum emission values were used in Eq. 2 as a simple measure of emission intensity.  
548 For LHCI, which has multiple distinct emission states<sup>38</sup>, values of emission intensity ( $FL_{int}$ ) were  
549 produced by integration across the emission spectrum using Eq. 3, and then applied in Eq. 2.

$$FL_{int} = \int \frac{\lambda}{hc} FL_{LHCI}(\lambda) d\lambda \quad (3)$$

550

551 Apparent efficiencies of ET were also calculated from the rate of P870 photobleaching ( $k_f$ )  
552 from the kinetic analyses summarised in Supplementary Table S2. To enable this the intensity of the  
553 650 nm excitation light used in these experiments was kept low such that no more than ~15 % of

554 P870 was oxidised within the lifetime of P870<sup>+</sup> (~ 1s), ensuring that photooxidation directly  
 555 represented the quantity of energy received by either direct absorption by the RC or ET from the  
 556 tethered LHC. The apparent efficiency of ET ( $E_{P870}$ ) was estimated from the rate of P870  
 557 photobleaching using:

$$E_{P870} = \frac{k_f(chimera) - k_f(RC)}{k_f(RC)} \frac{\int P(\lambda)(1 - 10^{Abs_{RC}(\lambda)})d\lambda}{\int P(\lambda)(1 - 10^{Abs_{LHC}(\lambda)})d\lambda} \quad (4)$$

558  
 559 where  $k_f$  was the rate of P870 oxidation in a chimera (*chimera*) or the equivalent RC-only control  
 560 (RC) (Supplementary Table S3). Integration of incident photon flux ( $P$ ) and the 1-transmission of RCs  
 561 or LHCs as a function of wavelength provided the number of photons absorbed by either RCs or  
 562 LHCIIs per unit area per second (Supplementary Table S3).

563 Equation 4 was also used for estimation of  $E_{electrode}$ , with parameter  $k_f$  replaced by the  
 564 maximum EQE around 650 nm (i.e. the same illumination region as used for measurements of P870  
 565 oxidation). The efficiency was determined by comparing the LHC's contribution to the EQE with the  
 566 sample absorbance at the corresponding wavelength (Supplementary Fig. S4). In addition to  
 567 enabling direct comparison of  $E_{electrode}$  and  $E_{P870}$ , the data at 650 nm were not affected by parasitic  
 568 absorption or unwanted emission from cyt *c*, UQ<sub>0</sub> or nano-structured silver used in photocurrent  
 569 measurements<sup>20,40</sup>.

570 For RC#LHCI#RC chimeras there were two acceptors per LHCI, one connected to the Lhca1  
 571 subunit and one to the Lhca4 subunit. Efficiencies of energy transfer to the Lhca1-connected RC ( $E_{a1}$ )  
 572 were estimated from:

$$E_{FL,P870} = \frac{E_{a1} + E_{a4} - 2E_{a1}E_{a4}}{1 - E_{a1}E_{a4}} \quad (5)$$

573  
 574 where  $E_{FL,P870}$  was the apparent energy transfer efficiency for the RC#LHCI#RC chimera estimated  
 575 from either LHC fluorescence or P870 photobleaching and  $E_{a4}$  was the corresponding apparent  
 576 energy transfer efficiency for the LHCI#RC chimera where the single RC is attached to Lhca4. From  
 577  $E_{FL}$  the value of  $E_{a1}$  was 10.4 % (compared to  $E_{a4} = 20.7$  %) and from  $E_{P870}$  the value of  $E_{a1}$  was 13.9  
 578 % (compared to  $E_{a4} = 20.1$  %).

579  
 580 **Estimation of solar radiance coverage enhancement.** The effect of the LHCs on the performance of  
 581 a bio-photoelectrode in response to visible light was estimated using:

$$U_{LHCII} = \int S(\lambda) \left( \frac{EQE_T(\lambda)}{EQE_{RC}(\lambda)} - 1 \right) d\lambda \quad (6)$$

582

583 where  $S(\lambda)$  was the air mass 1.5 standard solar power reference spectrum as a function of  
584 wavelength ( $\text{W m}^{-2}\text{nm}^{-1}$ ),  $EQE_T$  was the EQE spectrum of each LHC+RC system and  $EQE_{RC}$  was that of  
585 the RC-only reference (Supplementary Fig. S4, green versus red shade). Integration provided an  
586 estimate of the improvement in the use of solar energy ( $U_{LHCII}$ ) between 400 and 700 nm where the  
587 chlorophyll-based LHCS absorb. Values are compiled in Table 1.

588

589 **Protein structures and chimera modelling.** Protein structures used in modelling were Protein Data  
590 Bank entries 3ZUW for the *Rba. sphaeroides* RC<sup>62</sup>, 2BHW for the LHCII from pea<sup>31</sup>, 4KX8 for the LHCI  
591 from pea<sup>37</sup> and 4MLI for SpyCatcher/Tag<sup>42</sup>. Schematic models of chimeras were produced using  
592 Modeller<sup>63</sup>.

593

#### 594 References

- 595 1. Kolber, Z. S. *et al.* Contribution of aerobic photoheterotrophic bacteria to the carbon cycle in the  
596 ocean. *Science* **292**, 2492–2495 (2001).
- 597 2. Croce, R. & van Amerongen, H. Natural strategies for photosynthetic light harvesting. *Nat. Chem.*  
598 *Biol.* **10**, 492–501 (2014).
- 599 3. Saer, R. G. & Blankenship, R. E. Light harvesting in phototrophic bacteria: structure and function.  
600 *Biochem. J.* **474**, 2107–2131 (2017).
- 601 4. Scholes, G. D., Fleming, G. R., Olaya-Castro, A. & van Grondelle, R. Lessons from nature about solar  
602 light harvesting. *Nat. Chem.* **3**, 763–774 (2011).
- 603 5. Zinth, W. & Wachtveitl, J. The first picoseconds in bacterial photosynthesis - Ultrafast electron  
604 transfer for the efficient conversion of light energy. *ChemPhysChem* **6**, 871–880 (2005).
- 605 6. Jones, M. R. The petite purple photosynthetic powerpack. *Biochem. Soc. Trans.* **37**, 400–407 (2009).
- 606 7. Blankenship, R. E. *et al.* Comparing photosynthetic and photovoltaic efficiencies and recognizing the  
607 potential for improvement. *Science* **332**, 805–809 (2011).
- 608 8. Ort, D. R. *et al.* Redesigning photosynthesis to sustainably meet global food and bioenergy demand.  
609 *Proc. Natl. Acad. Sci.* **112**, 8529–8536 (2015).
- 610 9. Wang, F., Liu, X. & Willner, I. Integration of photoswitchable proteins, photosynthetic reaction  
611 centers and semiconductor/biomolecule hybrids with electrode supports for optobioelectronic  
612 applications. *Adv. Mater.* **25**, 349–377 (2013).
- 613 10. Nguyen, K. & Bruce, B. D. Growing green electricity: Progress and strategies for use of Photosystem I  
614 for sustainable photovoltaic energy conversion. *Biochim. Biophys. Acta - Bioenerg.* **1837**, 1553–1566  
615 (2014).
- 616 11. Yehezkeli, O., Tel-Vered, R., Michaeli, D., Willner, I. & Nechushtai, R. Photosynthetic reaction center-  
617 functionalized electrodes for photo-bioelectrochemical cells. *Photosynth. Res.* **120**, 71–85 (2014).
- 618 12. Ravi, S. K. & Tan, S. C. Progress and perspectives in exploiting photosynthetic biomolecules for solar  
619 energy harnessing. *Energy Environ. Sci.* **8**, 2551–2573 (2015).
- 620 13. Friebe, V. M. & Frese, R. N. Photosynthetic reaction center-based biophotovoltaics. *Curr. Opin.*  
621 *Electrochem.* **5**, 126–134 (2017).
- 622 14. Milano, F., Punzi, A., Ragni, R., Trotta, M. & Farinola, G. M. Photonics and optoelectronics with  
623 bacteria : making materials from photosynthetic microorganisms. *Adv. Funct. Mater.* **1805521**, 1–17  
624 (2018).
- 625 15. Ravi, S. K. *et al.* Photosynthetic bioelectronic sensors for touch perception, UV-detection, and

- 626 nanopower generation: toward self-powered e-skins. *Adv. Mater.* **1802290**, 1–9 (2018).
- 627 16. Sokol, K. P. *et al.* Bias-free photoelectrochemical water splitting with Photosystem II on a dye-  
628 sensitized photoanode wired to hydrogenase. *Nat. Energy* **3**, 944–951 (2018).
- 629 17. Tan, S. C., Crouch, L. I., Jones, M. R. & Welland, M. Generation of alternating current in response to  
630 discontinuous illumination by photoelectrochemical cells based on photosynthetic proteins. *Angew.*  
631 *Chemie - Int. Ed.* **51**, 6667–6671 (2012).
- 632 18. Mirvakili, S. M. *et al.* Photoactive electrodes incorporating electro sprayed bacterial reaction centers.  
633 *Adv. Funct. Mater.* **24**, 4789–4794 (2014).
- 634 19. Yaghoubi, H. *et al.* Large photocurrent response and external quantum efficiency in  
635 biophotoelectrochemical cells incorporating reaction center plus light harvesting complexes.  
636 *Biomacromolecules* **16**, 1112–1118 (2015).
- 637 20. Friebe, V. M. *et al.* Plasmon-enhanced photocurrent of photosynthetic pigment proteins on  
638 nanoporous silver. *Adv. Funct. Mater.* **26**, 285–292 (2016).
- 639 21. Ravi, S. K. *et al.* A mechanoresponsive phase-changing electrolyte enables fabrication of high-output  
640 solid-state photobioelectrochemical devices from pigment-protein multilayers. *Adv. Mater.* **30**, 1–8  
641 (2018).
- 642 22. Gundlach, K., Werwie, M., Wiegand, S. & Paulsen, H. Filling the ‘green gap’ of the major light-  
643 harvesting chlorophyll a/b complex by covalent attachment of Rhodamine Red. *Biochim. Biophys.*  
644 *Acta - Bioenerg.* **1787**, 1499–1504 (2009).
- 645 23. Dutta, P. K. *et al.* Reengineering the optical absorption cross-section of photosynthetic reaction  
646 centers. *J. Am. Chem. Soc.* **136**, 4599–4604 (2014).
- 647 24. Yoneda, Y. *et al.* Extension of light-harvesting ability of photosynthetic light-harvesting complex 2  
648 (LH2) through ultrafast energy transfer from covalently attached artificial chromophores. *J. Am.*  
649 *Chem. Soc.* **137**, 13121–13129 (2015).
- 650 25. Werwie, M., Fehr, N., Xu, X., Basché, T. & Paulsen, H. Comparison of quantum dot-binding protein  
651 tags: Affinity determination by ultracentrifugation and FRET. *Biochim. Biophys. Acta - Gen. Subj.*  
652 **1840**, 1651–1656 (2014).
- 653 26. Nabiev, I. *et al.* Fluorescent quantum dots as artificial antennas for enhanced light harvesting and  
654 energy transfer to photosynthetic reaction centers. *Angew. Chemie - Int. Ed.* **49**, 7217–7221 (2010).
- 655 27. Liu, J., Mantell, J., Di Bartolo, N. & Jones, M. R. Mechanisms of self-assembly and energy harvesting  
656 in tuneable conjugates of quantum dots and engineered photovoltaic proteins. *Small* **1804267**, 1–16  
657 (2018).
- 658 28. Wax, T. J. & Zhao, J. Optical features of hybrid molecular/biological-quantum dot systems governed  
659 by energy transfer processes. *J. Mater. Chem. C* **7**, 6512–6526 (2019).
- 660 29. Grayson, K. J. *et al.* Augmenting light coverage for photosynthesis through YFP-enhanced charge  
661 separation at the *Rhodobacter sphaeroides* reaction centre. *Nat. Commun.* **8**, 1–12 (2017).
- 662 30. Liu, Z. *et al.* Crystal structure of spinach major light-harvesting complex at 2.72 Å resolution. *Nature*  
663 **428**, 287–292 (2004).
- 664 31. Standfuss, J., Van Scheltinga, A. C. T., Lamborghini, M. & Kühlbrandt, W. Mechanisms of  
665 photoprotection and nonphotochemical quenching in pea light-harvesting complex at 2.5 Å  
666 resolution. *EMBO J.* **24**, 919–928 (2005).
- 667 32. Su, X., Wei, X., Zhu, D., Chang, W. & Liu, Z. Structure and assembly mechanism of plant C<sub>2</sub>S<sub>2</sub>M<sub>2</sub>-type  
668 PSII-LHCII supercomplex. *Science* **820**, 815–820 (2017).
- 669 33. Van Bezouwen, L. S. *et al.* Subunit and chlorophyll organization of the plant Photosystem II  
670 supercomplex. *Nat. Plants* **3**, 1–11 (2017).
- 671 34. Croce, R., Morosinotto, T., Castelletti, S., Breton, J. & Bassi, R. The Lhca antenna complexes of higher  
672 plants Photosystem I. *Biochim. Biophys. Acta - Bioenerg.* **1556**, 29–40 (2002).
- 673 35. Ben-Shem, A., Frolow, F. & Nelson, N. Crystal structure of plant Photosystem I. *Nature* **426**, 630–635  
674 (2003).
- 675 36. Wientjes, E. & Croce, R. The light-harvesting complexes of higher-plant Photosystem I: Lhca1/4 and  
676 Lhca2/3 form two red-emitting heterodimers. *Biochem. J.* **433**, 477–485 (2011).
- 677 37. Qin, X., Suga, M., Kuang, T. & Shen, J.-R. Structural basis for energy transfer pathways in the plant



- 678 PSI-LHCI supercomplex. *Science* **348**, 989–995 (2015).
- 679 38. Krüger, T. P. J., Wientjes, E., Croce, R. & van Grondelle, R. Conformational switching explains the  
680 intrinsic multifunctionality of plant light-harvesting complexes. *Proc. Natl. Acad. Sci.* **108**, 13516–  
681 13521 (2011).
- 682 39. Friebe, V. M. *et al.* On the mechanism of ubiquinone mediated photocurrent generation by a  
683 reaction center based photocathode. *Biochim. Biophys. Acta - Bioenerg.* **1857**, 1925–1934 (2016).
- 684 40. Friebe, V. M., Millo, D., Swainsbury, D., Jones, M. R. & Frese, R. N. Cytochrome c provides an  
685 electron-funneling antenna for efficient photocurrent generation in a reaction center  
686 biophotocathode. *ACS Appl. Mater. Interfaces* **9**, 23379–23388 (2017).
- 687 41. Zakeri, B. *et al.* Peptide tag forming a rapid covalent bond to a protein, through engineering a  
688 bacterial adhesin. *Proc. Natl. Acad. Sci. U. S. A.* **109**, 690–697 (2012).
- 689 42. Li, L., Fierer, J. O., Rapoport, T. A. & Howarth, M. Structural analysis and optimization of the covalent  
690 association between SpyCatcher and a peptide tag. *J. Mol. Biol.* **426**, 309–317 (2014).
- 691 43. Natali, A., Roy, L. M. & Croce, R. *In vitro* reconstitution of light-harvesting complexes of plants and  
692 green algae. *J. Vis. Exp.* **92**, 1–13 (2014).
- 693 44. Hobe, S., Prytulla, S., Kuhlbrandt, W. & Paulsen, H. Trimerization and crystallization of reconstituted  
694 light-harvesting chlorophyll a/b complex. *EMBO J.* **13**, 3423–3429 (1994).
- 695 45. Caffarri, S., Croce, R., Cattivelli, L. & Bassi, R. A look within LHCII: Differential analysis of the Lhcb1-3  
696 complexes building the major trimeric antenna complex of higher-plant photosynthesis.  
697 *Biochemistry* **43**, 9467–9476 (2004).
- 698 46. Croce, R., Weiss, S. & Bassi, R. Carotenoid-binding sites of the major light-harvesting complex II of  
699 higher plants. *J. Biol. Chem.* **274**, 29613–29623 (1999).
- 700 47. Schmid, V. H., Cammarata, K. V., Bruns, B. U. & Schmidt, G. W. *In vitro* reconstitution of the  
701 photosystem I light-harvesting complex LHCI-730: heterodimerization is required for antenna  
702 pigment organization. *Proc. Natl. Acad. Sci. U. S. A.* **94**, 7667–7672 (1997).
- 703 48. Passarini, F., Wientjes, E., van Amerongen, H. & Croce, R. Photosystem I light-harvesting complex  
704 Lhca4 adopts multiple conformations: Red forms and excited-state quenching are mutually  
705 exclusive. *Biochim. Biophys. Acta - Bioenerg.* **1797**, 501–508 (2010).
- 706 49. Hauska, G., Schoedl, T., Remigy, H. & Tsiotis, G. The reaction center of green sulfur bacteria.  
707 *Biochim. Biophys. Acta - Bioenerg.* **1507**, 260–277 (2001).
- 708 50. Gisriel, C. *et al.* Structure of a symmetric photosynthetic reaction center-photosystem. *Science* **357**,  
709 1021–1025 (2017).
- 710 51. Ihalainen, J. A. *et al.* Excitation decay pathways of Lhca proteins: A time-resolved fluorescence study.  
711 *J. Phys. Chem. B* **109**, 21150–21158 (2005).
- 712 52. Veggiani, G. *et al.* Programmable polyproteins built using twin peptide superglues. *Proc. Natl. Acad.*  
713 *Sci.* **113**, 1202–1207 (2016).
- 714 53. Buldun, C. M., Jean, J. X., Bedford, M. R. & Howarth, M. SnoopLigase catalyzes peptide-peptide  
715 locking and enables solid-phase conjugate isolation. *J. Am. Chem. Soc.* **140**, 3008–3018 (2018).
- 716 54. Swainsbury, D. J. K., Friebe, V. M., Frese, R. N. & Jones, M. R. Evaluation of a biohybrid  
717 photoelectrochemical cell employing the purple bacterial reaction centre as a biosensor for  
718 herbicides. *Biosens. Bioelectron.* **58**, 172–178 (2014).
- 719 55. Jones, M. R. *et al.* Mutants of *Rhodobacter sphaeroides* lacking one or more pigment-protein  
720 complexes and complementation with reaction-centre, LH1, and LH2 genes. *Mol. Microbiol.* **6**,  
721 1173–1184 (1992).
- 722 56. Lichtenthaler, H. & Wellburn, A. Determinations of total carotenoids and chlorophylls b of leaf  
723 extracts in different solvents. *Biochem. Soc. Trans.* **11**, 591–592 (1983).
- 724 57. Ma, J. & Xia, D. The use of blue native PAGE in the evaluation of membrane protein aggregation  
725 states for crystallization. *J. Appl. Crystallogr.* **41**, 1150–1160 (2008).
- 726 58. Gardecki, J. A. & Maroncelli, M. Set of secondary emission standards for calibration of the spectral  
727 responsivity in emission spectroscopy. *Appl. Spectrosc.* **52**, 1179–1189 (1998).
- 728 59. Würth, C., Grabolle, M., Pauli, J., Spieles, M. & Resch-Genger, U. Relative and absolute  
729 determination of fluorescence quantum yields of transparent samples. *Nat. Protoc.* **8**, 1535–1350



- 730 (2013).  
731 60. Rurack, K. & Spieles, M. Fluorescence quantum yields of a series of red and near-infrared dyes  
732 emitting at 600-1000 nm. *Anal. Chem.* **83**, 1232–1242 (2011).  
733 61. Krüger, T. P. J., Novoderezhkin, V. I., Ilioaia, C. & van Grondelle, R. Fluorescence spectral dynamics of  
734 single LHCII trimers. *Biophys. J.* **98**, 3093–3101 (2010).  
735 62. Gibasiewicz, K. *et al.* Mechanism of recombination of the P+H<sub>A</sub>-radical pair in mutant Rhodobacter  
736 sphaeroides reaction centers with modified free energy gaps between P+B<sub>A</sub><sup>-</sup> and P+H<sub>A</sub><sup>-</sup>. *J. Phys.*  
737 *Chem. B* **115**, 13037–13050 (2011).  
738 63. Webb, B. & Sali, A. Comparative protein structure modeling using MODELLER. *Curr. Protoc.*  
739 *Bioinforma.* **15**, 5.6.1-5.6.30 (2016).  
740

741 **Figures and table**

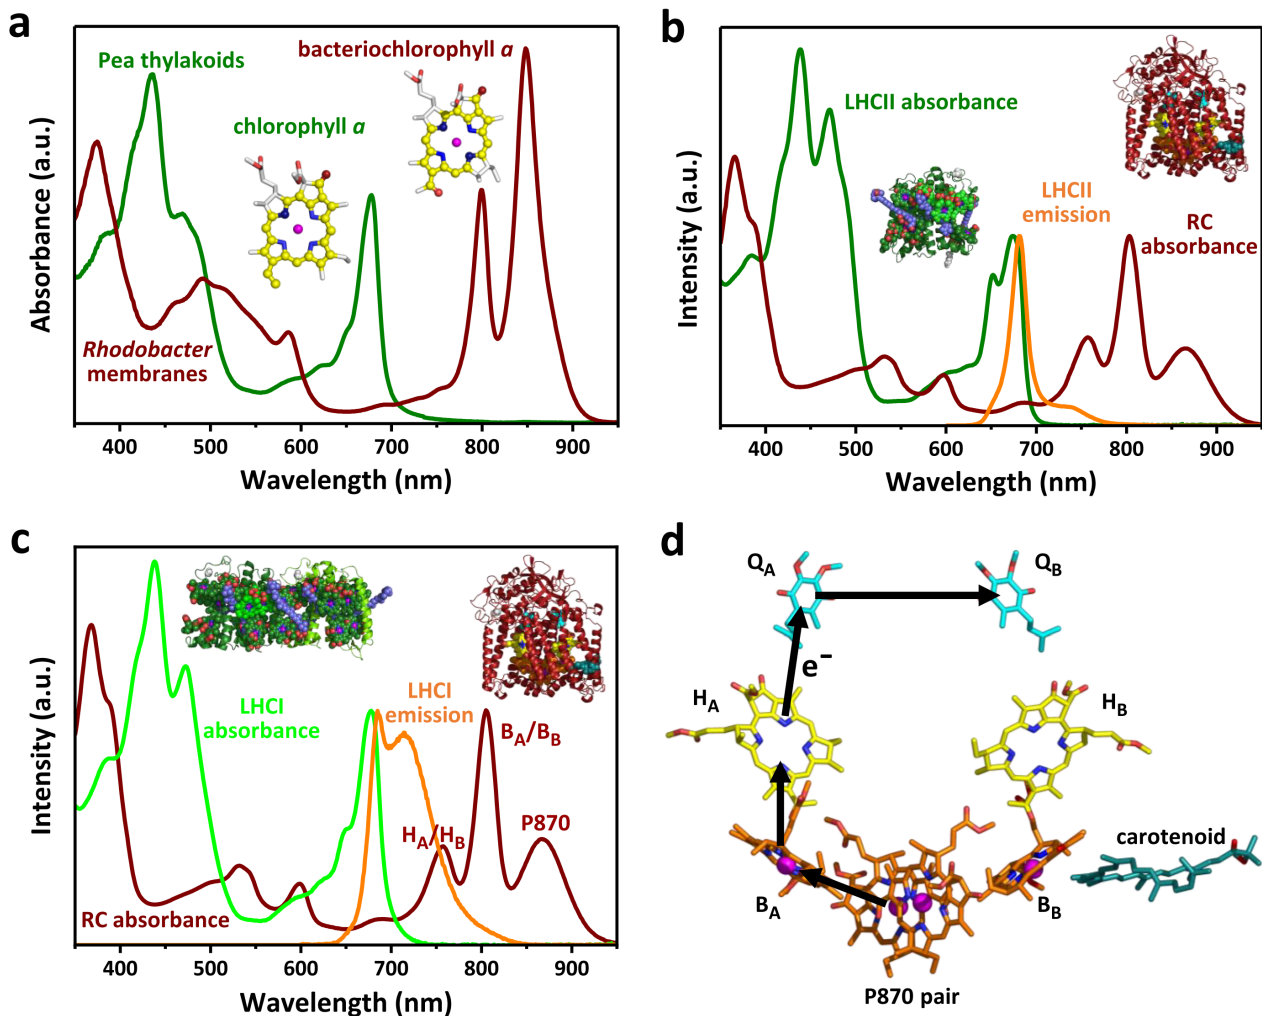

742

743 **Fig. 1** Component absorbance, emission and mechanism. **a** Thylakoid membranes from oxygenic  
 744 phototrophs such as pea and chromatophore membranes from anoxygenic phototrophs such as  
 745 *Rba. sphaeroides* have complementary absorbance spectra due to differences in the electronic  
 746 structures of the macrocycle  $\pi$  electron systems of chlorophyll and bacteriochlorophyll (see also  
 747 Supplementary Fig. S1). **b** The major plant light harvesting complex LHCII harvests solar energy in  
 748 regions where absorbance by *Rba. sphaeroides* RCs is weak, notably around 650 nm, and its  
 749 emission spectrum overlaps the absorbance spectrum of the RC between 640 nm and 800 nm. **c** The  
 750 red-enhanced emission spectrum of heterodimeric plant LHCI has a stronger overlap with the  
 751 absorbance spectrum of the *Rba. sphaeroides* RC, particularly the coincident absorbance bands of  
 752 the bacteriopheophytins ( $H_A/H_B$ ). **d** Architecture of the RC cofactors and the route of four-step  
 753 charge separation which oxidises P870 and reduces  $Q_B$ . The bacteriochlorophylls (orange carbons)  
 754 and bacteriopheophytins (yellow carbons) give rise to the absorbance bands labelled in **c**. Further  
 755 descriptions of pigment-protein structures and their sources are given in Supplementary Fig. S1.

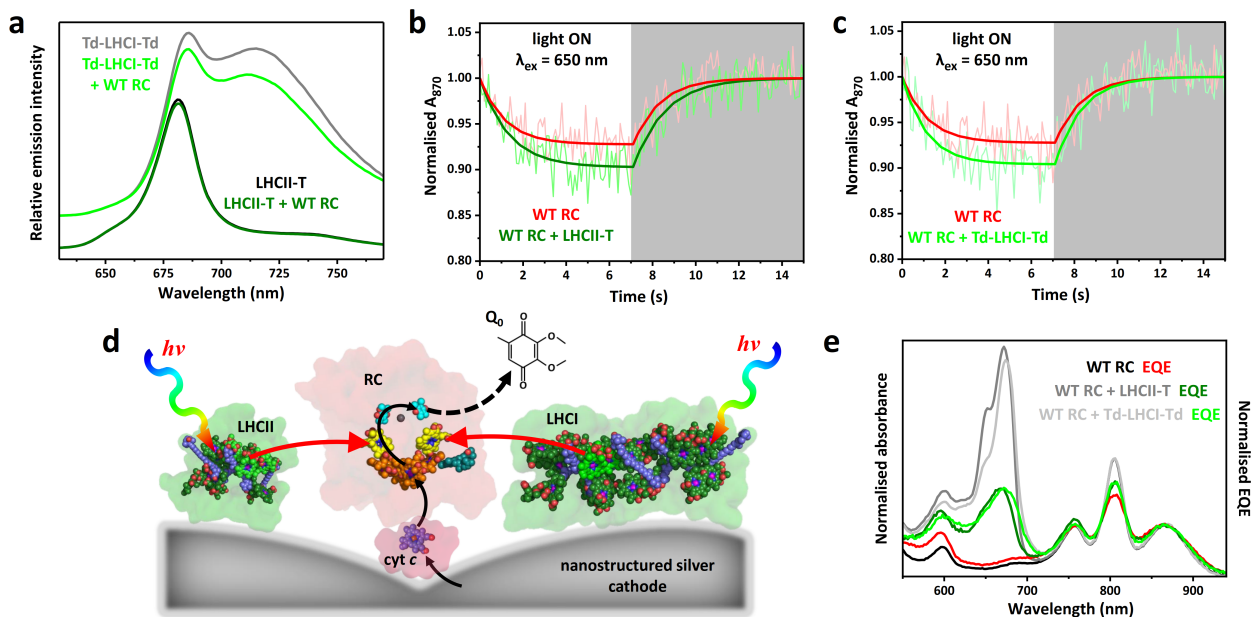

756

757 **Fig. 2** Energy transfer requires colocalization of RCs and LHCs. **a** LHCII emission (excitation at 475  
 758 nm) and LHCI emission (excitation at 500 nm) in the absence and presence of WT RCs. The latter  
 759 spectra are offset for clarity. **b** Data and fits for photobleaching and dark recovery of P870  
 760 absorbance for the WT RC in the absence and presence of LHCII (using variant LHCII-T). **c**  
 761 Photobleaching and dark recovery of P870 absorbance in WT RCs in the absence and presence of  
 762 LHCI (using variant Td-LHCI-Td). **d** Schematic of photocurrent generation on a nanostructured silver  
 763 electrode; black arrows show the route of electron transfer, red arrows show energy flow. **e** Solution  
 764 absorbance and EQE spectra for WT RCs compared with those for mixtures of WT RCs with either  
 765 LHCII-T or Td-LHCI-Td. The absorbance spectra were normalised at 804 nm, whilst each EQE  
 766 spectrum was normalised to the corresponding absorbance spectrum at the maximum of the long-  
 767 wavelength P870 band.

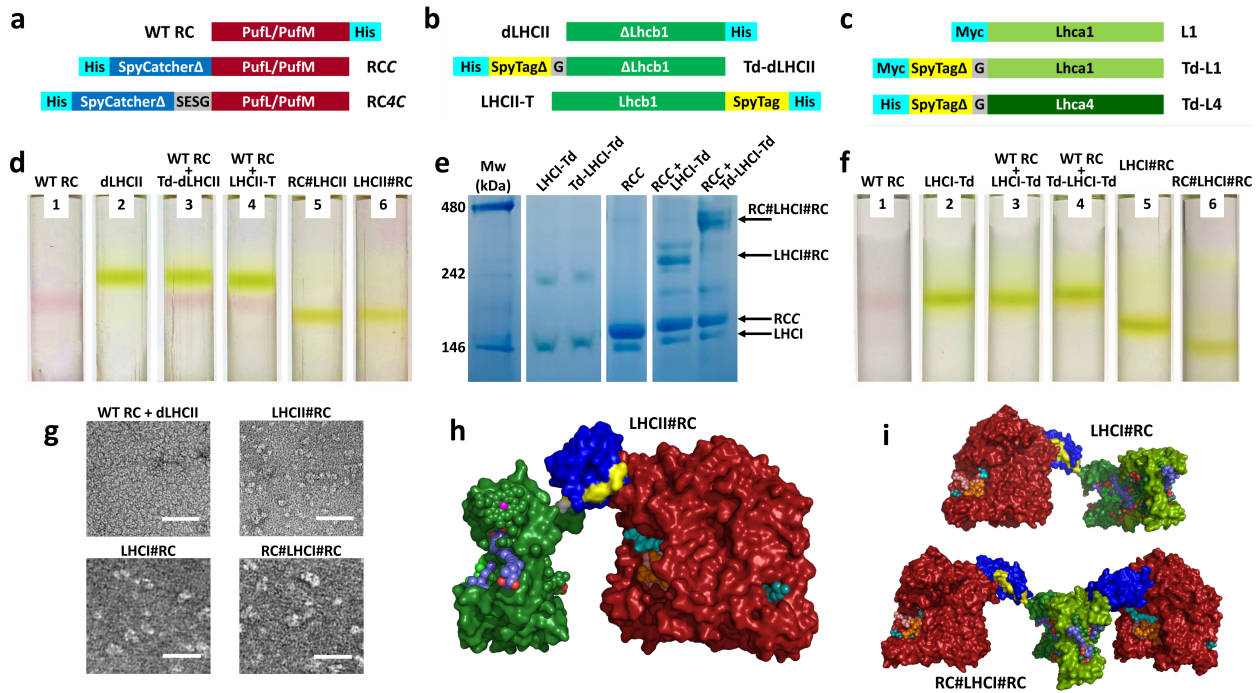

768

769 **Fig. 3** Engineering and assembly of RC-LHC chimeras. **a** Construct designs for adaptation of the RC.  
 770 For purification the WT RC was modified with a His-tag on PufM. **b** Construct designs for adaptation  
 771 of LHCII. The control LHCII was truncated at its N-terminus (dLHCII – see text) and was His-tagged at  
 772 its C-terminus. **c** Construct designs for adaptation of LHCI which is a Lhca1/Lhca4 heterodimer. For  
 773 **b** and **c** protein sequences are given in Supplementary Fig. S5a. **d** Sucrose density gradient  
 774 fractionation of RCs (red bands) and LHCII (green bands). RC-LHCII chimeras migrate to a lower  
 775 position in gradients than either RC or LHCII monomers, with no dissociation into components. **e**  
 776 Blue native PAGE showing the formation of high molecular weight products by mixing LHCI-Td or  
 777 Td-LHCI-Td with RCC (see Supplementary Fig. S7a for the full gel with more combinations). The  
 778 multiple bands seen for the high molecular weight products are likely to be due to conformational  
 779 heterogeneity. **f** Sucrose density gradient fractionation of RCs (red bands) and LHCIs (green bands).  
 780 LHCI#RC chimeras and larger RC#LHCI#RC chimeras migrate to lower positions than either RCs or  
 781 LHCI. **g** TEM images of an equimolar mixture of the WT RC and dLHCII (top/left), the LHCII#RC  
 782 chimera (top/right), the LHCI#RC chimera (bottom/left) and the RC#LHCI#RC chimera  
 783 (bottom/right). Additional images shown in Supplementary Fig. S17. **h** Molecular model of the  
 784 LHCII#RC chimera. The RC (maroon) N-terminally adapted with SpyCatcherΔ (blue) is covalently  
 785 linked to LHCII (green) C-terminally adapted with SpyTag (yellow). Cofactor colours are as described  
 786 in Supplementary Fig. S1. **i** Molecular models of the LHCI#RC and RC#LHCI#RC chimeras. Colours as  
 787 for panel **h** and Supplementary Fig. S1.

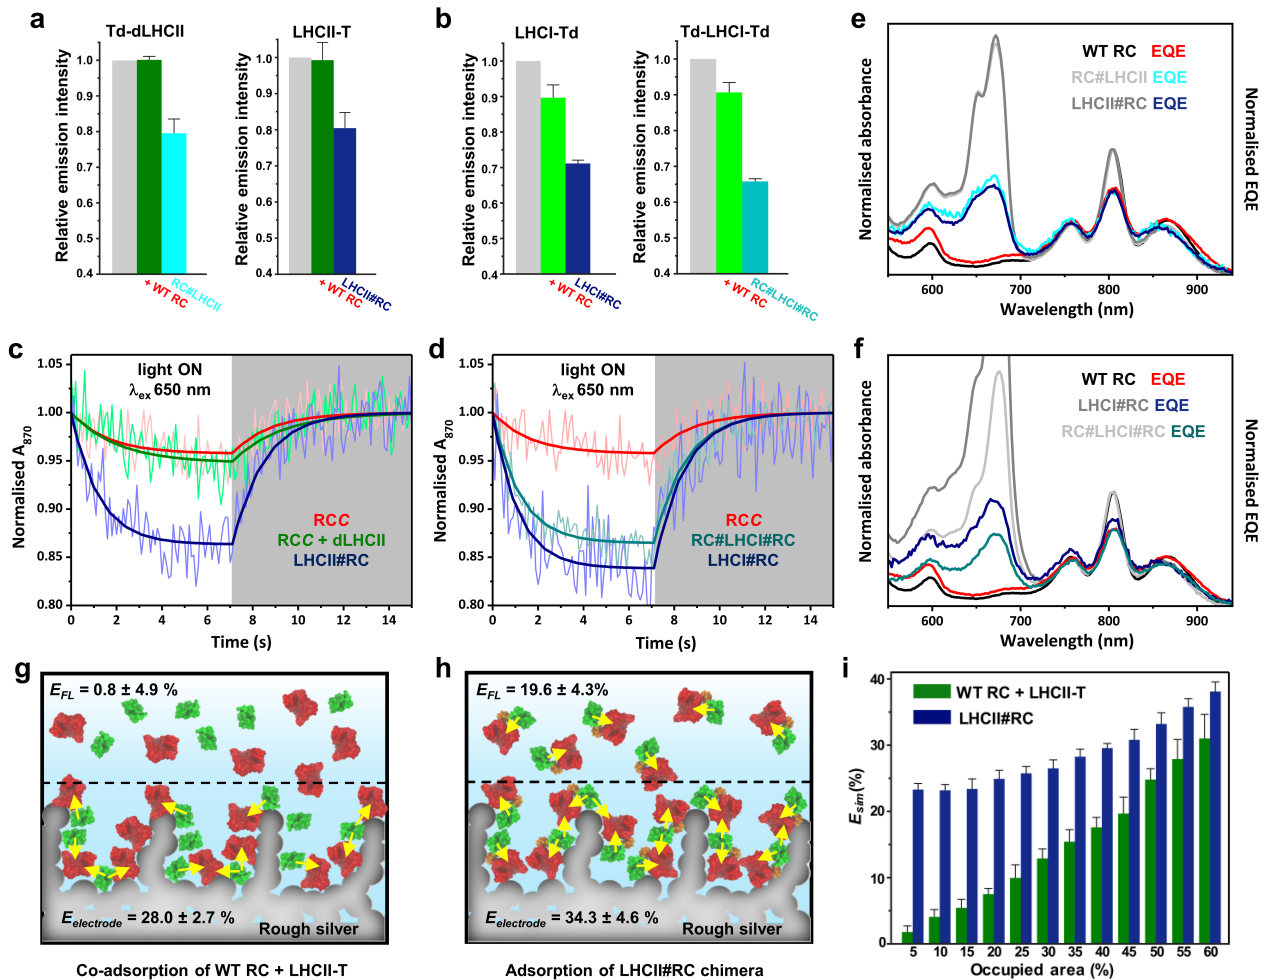

788

789 **Fig. 4** Energy transfer in chimeras in solution and on surfaces. **a** Emission at 682 nm from (left) the  
 790 Td-dLHCII protein alone (grey), after addition of a two-fold excess of WT RCs (green) and in a  
 791 LHCII#RC chimera (cyan) formed on mixing with a two-fold excess of RCC, and (right) equivalent data  
 792 for LHCII-T. **b** Emission from (left) LHCI-Td alone (grey), after addition of a three-fold excess of WT  
 793 RCs (green) and in a LHCI#RC chimera (navy) formed on mixing with a three-fold excess of RCC, and  
 794 (right) equivalent data for Td-LHCI-Td. **c** Data and fits for photobleaching and dark recovery of P870  
 795 absorbance in RCC, a 1:1 RCC plus dLHCII mixture and the LHCII#RC chimera. **d** Data and fits for  
 796 photobleaching and dark recovery of P870 absorbance in RCC and the two RC-LHCI chimeras. **e**  
 797 Solution absorbance and EQE spectra for WT RCs compared with those for the two LHCII-RC  
 798 chimeras. **f** Solution absorbance and EQE spectra for WT RCs compared with those for the two RC-  
 799 LHCI chimeras. **g** Schematic of adsorption of independent RC (red) and LHCII (green) complexes on  
 800 an electrode. Yellow arrows indicate possible energy transfer connections. **h** Equivalent schematic  
 801 of adsorption of RC#LHCII chimeras. **i** Simulated apparent ET efficiencies as a function of packing  
 802 density for independent RC and LHCII proteins or the LHCII#RC chimera.

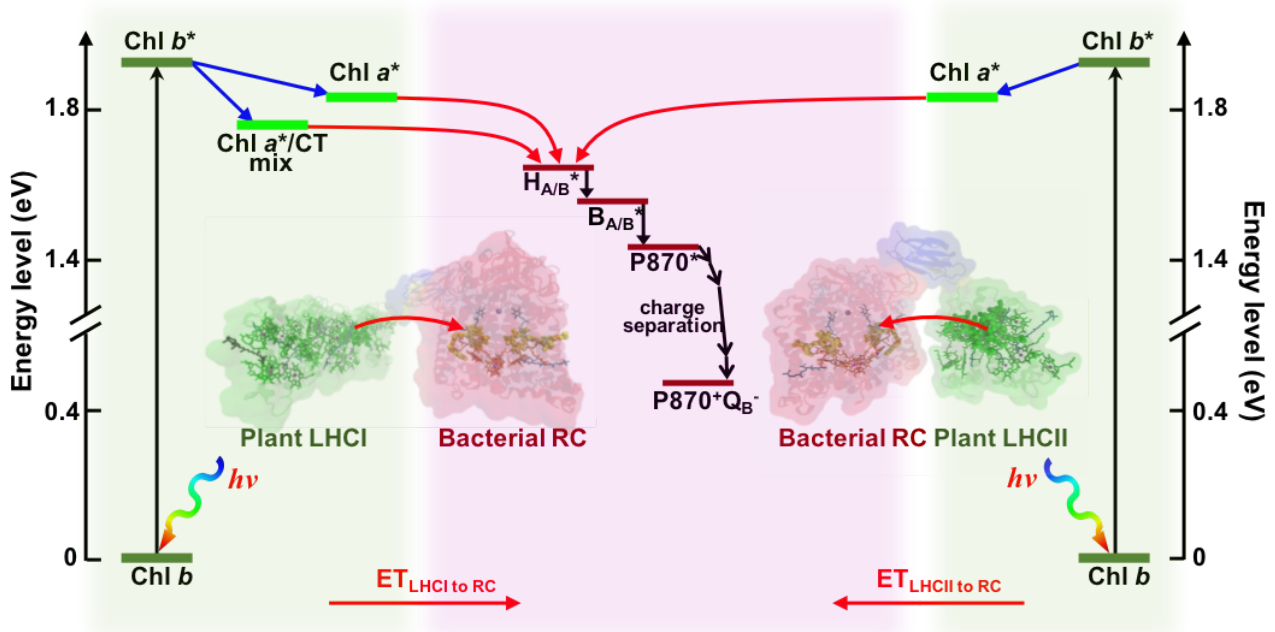

803

804 **Fig. 5** Solar energy conversion in chimeras. Energy flow within LHCII or LHCI is from higher energy  
 805 chlorophyll *b* to lower energy chlorophyll *a*. LHCI also exhibits a red-shifted emissive state with  
 806 mixed excitonic/charge transfer (CT) character. Excited state energy entering the RC via the  
 807 bacteriopheophytins ( $H_{A/B}$ ) migrates to the P870 bacteriochlorophylls via the monomeric  
 808 bacteriochlorophylls ( $B_{A/B}$ ), initiating charge separation to form  $P870^+Q_B^-$ . Energy harvested by the  
 809 carotenoid pigments of LHCII or LHCI (not shown) would be transferred to the RC via their chlorophylls  
 810 through fast internal relaxation<sup>61</sup>.

811



812 **Table 1.** Apparent energy transfer efficiencies and associated parameters.

| System             | $E_{P870}$<br>(%)        | $E_{FL}$<br>(%)         | $E_{electrode}$<br>(%) | $U_{LHC}$<br>(%) |
|--------------------|--------------------------|-------------------------|------------------------|------------------|
| LHCII-T + WT RC    | 1.2 ± 1.4 <sup>a</sup>   | 0.8 ± 4.9               | 28.0 ± 2.7             | 106.7            |
| LHCII#RC           | 22.8 ± 5.1               | 19.6 ± 4.3              | 34.3 ± 4.6             | 164.5            |
| RC#LHCII           | 21.0 ± 5.5               | 20.3 ± 3.6              | 33.6 ± 5.5             | 176.6            |
| LHCI-Td + WT RC    | 1.3 ± 1.3 <sup>a,b</sup> | 10.3 ± 3.6 <sup>b</sup> | 16.7 ± 1.9             | 120.1            |
| LHCI#RC            | 20.2 ± 4.6               | 20.7 ± 0.9              | 24.8 ± 1.6             | 222.9            |
| WT RC + Td-LHCI-Td | 3.3 ± 2.1 <sup>a,b</sup> | 9.3 ± 2.8 <sup>b</sup>  | 34.5 ± 2.3             | 129.8            |
| RC#LHCI#RC         | 29.1 ± 6.3 <sup>c</sup>  | 27.4 ± 1.8 <sup>c</sup> | 29.0 ± 1.3             | 90.9             |

813

814 <sup>a</sup> These low apparent energy transfer efficiencies may have arisen from some reabsorption of LHC  
815 fluorescence by RCs or a small degree of aggregation. Data for additional control mixtures can be  
816 found in Supplementary Table S4.

817 <sup>b</sup> The variance between  $E_{P870}$  and  $E_{FL}$  in these two cases is attributed to the latter largely reflecting  
818 a decrease in LHCI quantum yield on adding WT RCs rather than being due to ET (see text).

819 <sup>c</sup> RCs conjugated to each of Lhca1 and Lhca4 in the LHCI heterodimer.
